# Supplementary material for: CBL-interacting protein kinase 25 contributes to root meristem development
Source: PubMed Central journal article supplement (PMC6305191; doi:10.1093/jxb/ery334), 2018-09-18
Supplement: ery334_suppl_supplementary_tables_s1-s2.pdf [file ery334_suppl_supplementary_tables_s1-s2.pdf]

## **Supplementary Tables:**

### **CBL-interacting protein kinase 25 contributes to root meristem development**

Mukesh Kumar Meena, Niraj Kumar Vishwakarma, Vineeta Tripathi, Debasis Chattopadhyay

National Institute of Plant Genome Research, Aruna Asaf Ali Marg, New Delhi 110067, India

To whom correspondence should be addressed. Email: [debasis@nipgr.ac.in](mailto:debasis@nipgr.ac.in)

**Table S1:** Primers used in this study.

**Table S2.** A list of auxin- and cytokinin- responsive elements in CIPK25 (AT5G25110.1) promoter sequence

**Table S1:** Primers used in this study.

|    | <b>Primer</b>      | <b>Sequence</b>                         |
|----|--------------------|-----------------------------------------|
| 1  | LBb1               | 5'-GCGTGGACCGCTTGCTGCAACT-3'            |
| 2  | <i>cipk25-1</i> LP | 5'-AACAAATTCATCATCATGGCG-3'             |
| 3  | <i>cipk25-1</i> RP | 5'-TCCAACAATTAATCTCAGCCG-3'             |
| 4  | <i>cipk25-2</i> LP | 5'- TTGGATAATTGGTTTGGATCG -3'           |
| 5  | <i>cipk25-2</i> RP | 5'- CGAAGTTCTTTAACGCGTTTG -3'           |
| 6  | PRMCIPK25/FP       | 5'-CGGGATCCGGCCTAGAGGTATCTAACTT-3'      |
| 7  | PRMCIPK25/RP       | 5'-CGGGATCCCATGTGTATATACAGAAGTA-3'      |
| 8  | CIPK254T2F         | 5'-TCCCCCGGGATGGGATCCAAACTTAAACT-3'     |
| 9  | CIPK254T2R         | 5'-TCCCCCGGGTTAGCAGTCACTACCAGAAT        |
| 10 | CIP25SDM/L         | 5'-GGTTTGCTTCATGATCAGTGTGGAACT-3'       |
| 11 | CIP25SDM/R         | 5'-AGTTCCACACTGATCATGAAGCAAACC-3'       |
| 12 | CIPK25CFY          | 5'-GGAATTCCATATGGCGATTATGCGAACACCGTG-3' |
| 13 | CIPK25RY           | 5'-GGAATTCCATATGTTAGCAGTCACTACCAGAAT-3' |
| 14 | CIPK25FY           | 5'-GGAATTCCATATGGGATCCAAACTTAAACT-3'    |
| 15 | CBL1F              | 5'-GGAATTCCATATGGGCTGCTTCCACTCAA-3'     |
| 16 | CBL1R              | 5'-CGGAATTCTCATGTGGCAATCTCATCGA-3'      |
| 17 | CBL2F              | 5'-GGAATTCCATATGTCGCAGTGC GTTGACGG-3'   |
| 18 | CBL2R              | 5'-CGGAATTCTCAGGTATCTTCAACCTGAG-3'      |
| 19 | CBL3F              | 5'-GGAATTCCATATGTCGCAGTGCATAGACGG-3'    |
| 20 | CBL3R              | 5'-CGGAATTCTCAGGTATCTTCCACCTGCG-3'      |
| 21 | CBL4F              | 5'-GGAATTCCATATGGGCTGCTCTGTATCGAA-3'    |
| 22 | CBL4R              | 5'-CGGAATTCTTAGGAAGATACGTTTTGCA-3'      |
| 23 | CBL5F              | 5'-GGAATTCCATATGGGATGTGTTTGCAGCAA-3'    |
| 24 | CBL5R              | 5'-CGGAATTCTTACCGGAGAAAGTTGGGA-3'       |
| 25 | CBL6F              | 5'-GGAATTCCATATGATGATGCAATGTTTAGA-3'    |
| 26 | CBL6R              | 5'-CGGAATTCTCATCCATCCAGCTCACTAG-3'      |
| 27 | CBL7F              | 5'-GGAATTCCATATGGATTCAACAAGAAATTC-3'    |
| 28 | CBL7R              | 5'-CGGAATTCTCAGGTATCTTCCACTTGCG-3'      |
| 29 | CBL8F              | 5'-GGAATTCCATATGTTGGCATTTCGTGAAATG-3'   |
| 30 | CBL8R              | 5'-CGGAATTCCTAGTCTTCAACTTCAGAGT-3'      |
| 31 | CBL9F              | 5'-GGAATTCCATATGGGTTGTTTCCATTCCAC-3'    |
| 32 | CBL9R              | 5'-CGGAATTCTCACGTCGCAATCTCGTCCA-3'      |
| 33 | CBL10F             | 5'-CGGGATCCATATGGAACAAGTTTCCTCT-3'      |
| 34 | CBL10R             | 5'-CGAGCTCGTCAGTCTTCAACCTCAGTGT-3'      |

|    |                      |                                                                    |
|----|----------------------|--------------------------------------------------------------------|
| 35 | AtCIPK25prom 2.6k FP | 5'-CGGGATCCTATCAAAAGTCTGGGTCAAAC-3'                                |
| 36 | AtCIPK25prom 2.6k RP | 5'-CGGGATCCGTGTATATACAGAAGTAGAATG-3'                               |
| 37 | AtSHY2 prom 2.6k FP  | 5'-ACGCGTTCGACGTGGTGGTTAGATTGAAGTG-3'                              |
| 38 | AtSHY2 prom 2.6kRP   | 5'-GCTCTAGACCCTTCTTCAAGAATTGCAGGAG-3'                              |
| 39 | CAMCIPK25/L          | 5'-CCCATGGGGATGGGATCCAAACTTAAACT-3'                                |
| 40 | CAMCIPK25/R          | 5'-GACTAGTTTAGCAGTCACTACCAGAAT-3'                                  |
| 41 | Act2 F RT            | 5'-TCAGATGCCCAGAAGTCTTGTTTC-3'                                     |
| 42 | Act2 R RT            | 5'-GTGGATTCCAGCAGCTTCCA-3'                                         |
| 43 | AtCIPK25 F RT        | 5'-CCAGCGTTGGAGGAGATAGTGT-3'                                       |
| 44 | AtCIPK25 R RT        | 5'-CAGTCACTACCAGAATTTTCATCACTAA-3'                                 |
| 45 | ARR1 RT F            | 5'-TGCTAACCTCTTCGCAATCATC-3'                                       |
| 46 | ARR1 RT R            | 5'-TCTCGGAAATGCGGTTTGA-3'                                          |
| 47 | SHY2 RT N F          | 5'-CGGGAACAGATAATGTATGTGAA-3'                                      |
| 48 | SHY2 RT N R          | 5'-TGTTGTTATTACAGCAAGAAACTCTC-3'                                   |
| 49 | PIN1 RT F            | 5'-CACTTCATCGCCGCTAACA-3'                                          |
| 50 | PIN1 RT R            | 5'-GAATCTGCGGCGAGGAAAC-3'                                          |
| 51 | PIN2 RT F            | 5'-CCGTGGGGCTAAGCTTCTCATCT-3'                                      |
| 52 | PIN2 RT R            | 5'-AGCTTTCGGTCGTCTCCTATCTCC-3'                                     |
| 53 | PIN3 RT F            | 5'-GAAAATCTTCTCACCCGACCAA-3'                                       |
| 54 | PIN3 RT R            | 5'-GGCGAAGATGGCGACAAA-3'                                           |
| 55 | PIN7 RT F            | 5'-CGGCATAAACCGCTTCGT-3'                                           |
| 56 | PIN7 RT R            | 5'-TTGAGGAGATGAAGTGGAAAGAGA-3'                                     |
| 57 | ARF5 RT F            | 5'-GCCACGTAGAGCTGCAGAGAA-3'                                        |
| 58 | ARF5 RT R            | 5'-TGGCGGCTGTGCTGAGT-3'                                            |
| 59 | ARF6 RT F            | 5'-CGCGCCATCTTCCAACA-3'                                            |
| 60 | ARF6 RT R            | 5'-CGTCACAGTTCCCGTTGCT-3'                                          |
| 61 | ARF7 RT F            | 5'-TGACGGTGATTCCAGGAACA-3'                                         |
| 62 | ARF7 RT R            | 5'-AGGCACAAAGCCATTATCAACA-3'                                       |
| 63 | ARF8 RT F            | 5'-GTGCATCAAATGGGAGATCATG-3'                                       |
| 64 | ARF8 RT R            | 5'-TCGGGTTTTGCGGGAAT-3'                                            |
| 65 | ARF19 RT F           | 5'-TGGAGGACTGTGGCCAAT-3'                                           |
| 66 | ARF19 RT R           | 5'-ACCCTCGTTTTTGAACCTTTGTAT-3'                                     |
| 67 | AtCIPK25prom SmaI FP | 5'-TCCCCCGGGTATCAAAAGTCTGGGTCAAAC-3'                               |
| 68 | AtCIPK25 SmaI RP     | 5'-TCCCCCGGGTTAGCAGTCACTACCAGAAT-3'                                |
| 69 | AtCIPK25F-attB1      | 5'-GGGGACAAGTTTGTACAAAAAAGCAGGCTTCATGGG<br>ATCCAAACTTAAACTTTAC-3'  |
| 70 | AtCIPK25F-attB2      | 5'-GGGGACCACTTTGTACAAGAAAGCTGGGTTGCAGTC<br>ACTACCAGAATTTTCATCAC-3' |

**Table S2.** A list of auxin- and cytokinin- responsive elements in CIPK25 (AT5G25110.1)

promoter sequence

-2116

AATGTGTAATTAGTGAACCTTGAACTTTTGAAAAATAATTTGAAATATCTCGTTA  
TACGATTAATTATATGAAAATTCATAGAAAATGTGATGCTAATAGGAATATAGCA  
ATTTGGGGGAAAAATCTAATGAAAAAGGATTTTATGAACTTCATATATTATTAC  
TATTTTTTGTAAACATGAAATTTGGAGTGACTTCAAACAAATTA AAAATATGAA  
ATCTCCCATATATACAACATCAACGTAAAAAAACAAAAAAAAGCCTCATT  
GCCTCGTTATCGTCGGATTCTATCGTATTGATCTCTTCATGGTAGTCTCCATTATT  
CATCTTGACCATTTCGTTGTTCTCATGTCTCTCTTAATCTCCGGTTAAGCTCTGATT  
CTCACTTTGATCTCTTGTTTCGATCTTTCTACTATTATTATTGCATTTACTATTTAAA  
ATTTTATATCCTAGTAGTTGGATCTCTAATCTCTTATTAACAAATTATTGACGTAG  
ATGACAAAAAATAAAAAAATCATTGACGTTAATCTTACACATTATGTTCTGTG  
AGGTAGTAGAACAATTTTGGAGGTAACACTTTTCTTTCACAGTTGTTGTCTTCGTC  
AAAACATATGGGCTAGAGGTATCTAACTTTTGATACGAAAATTCTCCTTAGCAGC  
ATTTTAAAAAATCATAAGAGCCCACTGAATCTCAAGCCTTTTATAATCATTAG  
AATATATTTGATATTTATTA AAAAGCCCACTAATTTTAAAATCCACCAAAAATAATC  
AAAATCCTTAATCCAATAGACCCTTAAATAGTTAAATTATTTAGAACTCTAACA  
AATCTTTTATTTAACAACCTTCCTAAGCTTAAAGTTTGTAATTGTTTTGTATTTTT  
CCCAAAGTTTTAGTATCTTGATATTTTAAAGATCGTTCTATAAATAGATTTGATTTT  
GTAAGTTGTTTATATTGTTACTAGGCCTTTGTATAAATACCAAATACTTTGATTAT  
TTTTTTACTGATTTTCATGTCAAACAAAATTCCAAACAACCTTAAAGGAAAAAGCTT  
ACTCGATTGGAATAAAAATTGTACGTTTAAACAAAATGATATTAGTGAAATAAATA  
AACCAGCTCAACATTTAAGGATTTCTACGTGTATATACAGTAATCGTGTTTAGTA  
TTAATTAGCTATAGTTTAGCCTCAAAAAACAAAGATCCAAAACAACATGACGAA  
ATTGACTTCCACATCGTGTCCCTTCTCGTCGACATAAAAACCTTTAATATATAGATG  
CATGTATAAGTATACTCACTATTTGTGTCATTAGTATTTTCTTTTTTGATACTTGG  
AGCTAATGACAAAAATCCGCTAGAAATATCTTCTCCAACGATAGCTACAAACA  
AATACTACCATTGCGTCATCATCACTTATTTATATTCGATATTTTCAGTCAACAACA  
CTAATCTCTTTCACCAAAATCTTTGGACTATTATTACAAATGAATTA AAAACTTG  
GACCCTTAATAACATATTTGTTTCATTAAATCTATACAACTCTTATTA AAAATGAT  
ATTTTCTTAAATCAAAAATTAATCAAAAATTAAGGTAGGCTCTAGAGGATTGCATC  
ATTTGCCACCCACATTAGCCTGCCATTATTATTGGACGGTAACAAATTTCTTAC  
ACCAATAAATGGTAAGTTACAATTATTATTAACATTTCTATATA AAAATAGTTTGG  
TTATTTACATTAATTTTTATTTAATACTATAAACTTAAAAATTC AATGCTGAAAAG  
TGTAACGAAAGAGGGACATTAATATATGTTAATATAATAAGTATATTTACTAT  
TTAAAAAAGACTTATGTAAATACATATTGTATAGAGAGAAAAATAACCCATAGT  
ATAAAAACCTTGCATCTCTAAAACCGCAGCATTGATAATAAGAGTCTCTTTCTTCT  
TAAGTATCTCTTAATTAACCCACATAATATATTTACAAGTGGCCGCCTCATA CAT  
CCCCTCTCAAGTCCTTTGCTTCATTTCTTATA AAAACTAAACCACCTTCTTCTTCAT  
CATTCATCAACCAATCTATCTCATATTCCATATACTGAATATGGACTCATTCTACTT  
CTGTATATACAC

| <b>TFs</b> | <b>Position</b> | <b>Strand</b> | <b>Sequence</b> | <b>Similar Score</b> |                             |
|------------|-----------------|---------------|-----------------|----------------------|-----------------------------|
| ARF1       | -1646           | +             | TGTCTc          | 1                    | <b>Auxin Responsive</b>     |
| ARF2       | -1646           | +             | TGTCTc          | 1                    |                             |
| ARF9       | -1646           | +             | TGTCTc          | 1                    |                             |
| ARF10      | -1646           | +             | TGTCTc          | 1                    |                             |
| ARF11      | -1646           | +             | TGTCTc          | 1                    |                             |
| ARF12      | -1646           | +             | TGTCTc          | 1                    |                             |
| ARF13      | -1646           | +             | TGTCTc          | 1                    |                             |
| ARF16      | -1646           | +             | TGTCTc          | 1                    |                             |
| ARF17      | -1646           | +             | TGTCTc          | 1                    |                             |
| ARF18      | -1646           | +             | TGTCTc          | 1                    |                             |
| ARF21      | -1646           | +             | TGTCTc          | 1                    |                             |
| ARF23      | -1646           | +             | TGTCTc          | 1                    |                             |
| ARR1       | -1311           | +             | actGAATCtc      | 0.981                | <b>Cytokinin Responsive</b> |
| ARR2       | -1103           | +             | tagtATCTTg      | 0.974                |                             |
| ARR2       | -806            | -             | aAAGATccaa      | 0.953                |                             |
| ARR12      | -1878           | -             | AATCT           | 1                    |                             |
| ARR12      | -1864           | +             | GGATT           | 1                    |                             |
| ARR12      | -1781           | -             | AATCT           | 1                    |                             |
| ARR12      | -1712           | +             | GGATT           | 1                    |                             |
| ARR12      | -1636           | -             | AATCT           | 1                    |                             |
| ARR12      | -1530           | -             | AATCT           | 1                    |                             |
| ARR12      | -1469           | -             | AATCT           | 1                    |                             |
| ARR12      | -1307           | -             | AATCT           | 1                    |                             |
| ARR12      | -1242           | -             | AATCC           | 1                    |                             |
| ARR12      | -1223           | -             | AATCC           | 1                    |                             |
| ARR12      | -1216           | -             | AATCC           | 1                    |                             |
| ARR12      | -1069           | +             | AGATT           | 1                    |                             |
| ARR12      | -873            | +             | GGATT           | 1                    |                             |
| ARR12      | -558            | -             | AATCT           | 1                    |                             |
| ARR12      | -543            | -             | AATCT           | 1                    |                             |
| ARR12      | -477            | -             | AATCT           | 1                    |                             |
| ARR12      | -404            | +             | GGATT           | 1                    |                             |
| ARR12      | 60              | -             | AATCT           | 1                    |                             |
| ARR14      | -1311           | +             | actgAATCTc      | 0.982                |                             |
| ARR14      | -1070           | -             | tAGATTgat       | 0.978                |                             |
| ARR18      | -1375           | +             | gaggTATCTaact   | 0.942                |                             |
| ARR18      | -1104           | +             | ttagTATCTgat    | 0.947                |                             |
| ARR18      | -63             | +             | taagTATCTetta   | 0.942                |                             |
| ARR19      | -1878           | -             | AATCT           | 1                    |                             |
| ARR19      | -1864           | +             | GGATT           | 1                    |                             |
| ARR19      | -1781           | -             | AATCT           | 1                    |                             |
| ARR19      | -1712           | +             | GGATT           | 1                    |                             |

---

|       |       |   |       |   |       |
|-------|-------|---|-------|---|-------|
| ARR19 | -1636 | - | AATCT | 1 | _____ |
| ARR19 | -1530 | - | AATCT | 1 |       |
| ARR19 | -1469 | - | AATCT | 1 |       |
| ARR19 | -1307 | - | AATCT | 1 |       |
| ARR19 | -1242 | - | AATCC | 1 |       |
| ARR19 | -1223 | - | AATCC | 1 |       |
| ARR19 | -1216 | - | AATCC | 1 |       |
| ARR19 | -1069 | + | AGATT | 1 |       |
| ARR19 | -873  | + | GGATT | 1 |       |
| ARR19 | -558  | - | AATCT | 1 |       |
| ARR19 | -543  | - | AATCT | 1 |       |
| ARR19 | -477  | - | AATCT | 1 |       |
| ARR19 | -404  | + | GGATT | 1 |       |
| ARR19 | 60    | - | AATCT | 1 |       |

---
